# Supplementary material
Source: PubMed Central journal article supplement (PMC5543723)
Supplement: NIHMS886325-supplement-Supplementary_Table_1.pdf [file NIHMS886325-supplement-Supplementary_Table_1.pdf]

**Supplementary Table1 Summary of clinical presentations, and CMA and molecular findings in nine individuals with *TRIP12* mutations**

|                                           | #Suppl 1                                               | #Suppl 2                                                                                       |
|-------------------------------------------|--------------------------------------------------------|------------------------------------------------------------------------------------------------|
| <b>Gender</b>                             | Male                                                   | Male                                                                                           |
| <b>Age at examination (years)</b>         | 2.8 yo                                                 | 2.75 yo                                                                                        |
| <b><i>TRIP12</i> Variant (NM_004238)</b>  | Splicing<br>c.1145-2A>C                                | Deletion of 4 exons (1-4) of <i>TRIP12</i> and <i>FBXO36</i><br>2q36.3 del<br>Size: 144 Kb del |
| <b>Ethnicity</b>                          | Mexican-American                                       | NA                                                                                             |
| <b>Inheritance</b>                        | Mother negative, father NA                             | Parents ND                                                                                     |
| <b>Maternal age at birth (years)</b>      | 20                                                     | NA                                                                                             |
| <b>Paternal age at birth (years)</b>      | 21                                                     | NA                                                                                             |
| <b>DD/ID</b>                              | +                                                      | +                                                                                              |
| <b>Autism/Autistic behaviors</b>          | +. Aggression behavioral problems                      | ND                                                                                             |
| <b>Speech delay</b>                       | -                                                      | +                                                                                              |
| <b>Motor delay</b>                        | -<br>Reported to be clumsy, falls and bumps frequently | +                                                                                              |
| <b>Microcephaly/OFC (cm) (percentile)</b> | -                                                      | ND                                                                                             |
| <b>Obesity/Weight (kg, percentile)</b>    | -12.7kg (28%)                                          | -                                                                                              |
| <b>Height (cm)</b>                        | 89.5cm (33%)                                           | 113.5 (6%)                                                                                     |
| <b>Head shape</b>                         | Plagiocephaly                                          | ND                                                                                             |
| <b>Narrow palpebral fissures</b>          | -                                                      | ND                                                                                             |
| <b>Downturned mouth corners</b>           | +                                                      | ND                                                                                             |
| <b>Hypertelorism</b>                      | +                                                      | ND                                                                                             |
| <b>Depressed nasal bridge</b>             | +                                                      | ND                                                                                             |
| <b>Long philtrum</b>                      | -(short philtrum)                                      | ND                                                                                             |
| <b>Large ear lobe</b>                     | -(mildly dysplastic ears)                              | ND                                                                                             |

Abbreviations are as follows: NA, not available; ND, not determined because of non-availability or non-applicability

**Supplementary Table2 Predicted interpretations of *TRIP12* SNP mutations**

| Subjects  | Genomic coordinate | Nucleotide       | Protein     | RawScore | CADD Score |
|-----------|--------------------|------------------|-------------|----------|------------|
| Subject 6 | Chr2:230661450     | c.3446_3447delCA | p.S1149X    | 8.643724 | 35         |
| Subject 7 | Chr2:230666969     | c.2979dupA       | p.G994Rfs*5 | 8.334326 | 35         |
| Subject 8 | Chr2:230672494     | c.2282C>T        | p.A761V     | 2.814147 | 21.4       |
| Subject 9 | Chr2:230659894     | c.3743+1G>A      | ?           | 6.045971 | 28         |
